# Supplementary material for: Selection of Cell Populations with High or Low Surface Marker Expression Using Magnetic Sorting
Source: MDPI journal article supplement (doi:10.3390/cells12091286), 2023-04-29
Supplement: s1 [file s1]

Table S1. Main characteristics of fluorescent cell populations before and after magnetic selection.

| Relevant figure  | Percentage of positive cells | MFI           | Percentage of positive cells | MFI         | Percentage of positive cells | MFI         | Percentage of positive cells | MFI         |
|------------------|------------------------------|---------------|------------------------------|-------------|------------------------------|-------------|------------------------------|-------------|
| <b>Figure 2</b>  |                              |               |                              |             |                              |             |                              |             |
| Before           | 57                           | 1333          |                              |             |                              |             |                              |             |
| 10 $\mu$ L MBs   | 90                           | 2675          |                              |             |                              |             |                              |             |
| 80 $\mu$ L MBs   | 70                           | 1270          |                              |             |                              |             |                              |             |
|                  |                              |               |                              |             |                              |             |                              |             |
| <b>Figure 3</b>  |                              |               |                              |             |                              |             |                              |             |
| Before           | 94                           | 2600          |                              |             |                              |             |                              |             |
| 50 $\mu$ L MBs   | 96                           | 2676          |                              |             |                              |             |                              |             |
| 5 $\mu$ L MBs    | 99                           | 5630          |                              |             |                              |             |                              |             |
|                  |                              |               |                              |             |                              |             |                              |             |
| <b>Figure 5*</b> |                              |               |                              |             |                              |             |                              |             |
| Before           | (1)<br>80                    | (1)<br>17,450 | (2)<br>42                    | (2)<br>5300 | (3)<br>37                    | (3)<br>5395 | (4)<br>20                    | (4)<br>4400 |
| 10 $\mu$ L MBs   | 99                           | 39,700        | 98                           | 15,150      | 98                           | 11,960      | 94                           | 8700        |
|                  |                              |               |                              |             |                              |             |                              |             |
| <b>Figure 6</b>  |                              |               |                              |             |                              |             |                              |             |
| Before           | 98                           | 30,200        |                              |             |                              |             |                              |             |
| 1 $\mu$ L MBs    | 98                           | 47,070        |                              |             |                              |             |                              |             |
| 0.5 $\mu$ L MBs  | 98                           | 47,800        |                              |             |                              |             |                              |             |
|                  |                              |               |                              |             |                              |             |                              |             |
| <b>Figure 7</b>  | I stage                      | I stage       |                              |             |                              |             |                              |             |
| Before           | 98                           | 32,600        |                              |             |                              |             |                              |             |
| 1.5 $\mu$ L MBs  | 98.6                         | 47,000        |                              |             |                              |             |                              |             |
|                  | II stage                     | II stage      |                              |             |                              |             |                              |             |
| Before           | 97.4                         | 24,000        |                              |             |                              |             |                              |             |
| 5 $\mu$ L MBs    | 98                           | 26,100        |                              |             |                              |             |                              |             |
|                  |                              |               |                              |             |                              |             |                              |             |
| <b>Figure 8</b>  | Low cells                    |               | High cells                   |             |                              |             |                              |             |
| Before           | 24.5                         | 1730          | 47.5                         | 23,030      |                              |             |                              |             |
| 60 $\mu$ L MBs   | 26                           | 2164          | 71                           | 27,000      |                              |             |                              |             |

\*Results for THE Figure 5 are presented in several columns and correspond to four cell populations transduced with different amounts of viral supernatant.
